# Supplementary material for: Spawning of French grunts, Haemulon flavolineatum, in recirculating aquarium systems
Source: PeerJ. 2020 Jul 1;8:e9417. doi: 10.7717/peerj.9417 (PMC7334976; doi:10.7717/peerj.9417)
Supplement: Supplemental Information 1 — Mean ±SE; letters indicate significance ( p < 0.05) according to One-way ANOVA and post hoc Tukey test of environmental conditions among the systems [file peerj-08-9417-s001.xlsx]

## Sheet: Overview Row Format
System	1		2		3		4		5
Tank	A	B	A	B	A	B	A	B	A	B
# of Males	2	2	1	2	2	2	0	1	0	2
# of Females	2	2	3	2	2	2	4	3	4	2
Mean Male Weight (g)	127.9	93.2	128.8	73.3	101.7	96.2	NA	110.7	NA	101.8
Mean Male Fork Length (cm)	17.7	15.2	17	14.9	15.8	16.1	NA	16.5	NA	15.8
Mean Female Weight (g)	81.9	100.5	93.4	88.9	96.1	83.9	91.2	96.2	98	90.1
Mean Female Fork Length (cm)	15.4	15.9	15.9	16.1	15.8	15.2	15.8	15.6	15.6	15.3
Mean # of Eggs Collected	5064		10814		4575		4949		7667
# of Days Eggs Collected	46		50		43		43		43
Mean Temperature (°C)	26		26.4		26.3		25.7		26.3
Mean Salinity (ppt)	31.6		32.3		31.6		31.4		32
Mean pH	8.1		8.08		8.07		8.13		8.03
Mean DO (mg/L)	6.6		6.6		6.5		6.6		6.6
Mean Alkalinity (mEg/L)	3.39		3.43		3.4		3.29		3.29

## Sheet: Overview Column Format
System	Tank	# of Males	# of Females	Mean Male Weight (g)	Mean Male Fork Length (cm)	Mean Female Weight (g)	Mean Female Fork Length (cm)	Mean # of Eggs Collected	# of Days Eggs Collected	Mean Temperature (°C)	Mean Salinity (ppt)	Mean pH	Mean DO (mg/L)	Mean Alkalinity (mEg/L)
1	A	2	2	127.9	17.7	81.9	15.4	5064	46	26	31.6	8.1	6.6	3.39
	B	2	2	93.2	15.2	100.5	15.9
2	A	1	3	128.8	17	93.4	15.9	10814	50	26.4	32.3	8.08	6.6	3.43
	B	2	2	73.3	14.9	88.9	16.1
3	A	2	2	101.7	15.8	96.1	15.8	4575	43	26.3	31.6	8.07	6.5	3.4
	B	2	2	96.2	16.1	83.9	15.2
4	A	0	4	NA	NA	91.2	15.8	4949	43	25.7	31.4	8.13	6.6	3.29
	B	1	3	110.7	16.5	96.2	15.6
5	A	0	4	NA	NA	98	15.6	7667	43	26.3	32	8.03	6.6	3.29
	B	2	2	101.8	15.8	90.1	15.3

## Sheet: Eggs used to determine diameter
Egg #	System 1	System 2
1	1	0.91
2	0.933	0.947
3	0.986	0.897
4	0.94	0.93
5	0.958	0.948
6	0.966	0.941
7	1.005	0.897
8	0.95	0.888
9	0.982	0.924
10	0.977	0.941
11	0.927	0.935
12	0.947	0.95
13	0.937	0.926
14	0.997	0.902
15	0.98	0.96

## Sheet:  Volume of eggs + #of Eggs
Date	Volume of eggs for each tank (mL)						Number of Eggs for each tank
	1	2	3	4	5		1	2	3	4	5
2013-01-01	0	0	0	0	0		0	0	0	0	0
2013-01-02	12.5	0	1	0	10		28196.3	0	2255.7	0	22557
2013-01-03	0	7.5	6.5	4.5	4		0	16917.8	14662.1	10150.7	9022.81
2013-01-04	3	15	5	13	1		6767.11	33835.6	11278.5	29324.1	2255.7
2013-01-05	1	5.5	0	0	0		2255.7	12406.4	0	0	0
2013-01-07	2	0	0	0	0		4511.41	0	0	0	0
2013-01-08	4.5	5	4.5	1	10		10150.7	11278.5	10150.7	2255.7	22557
2013-01-09	4	1	0	0	0		9022.81	2255.7	0	0	0
2013-01-10	6.5	11.5	6.5	0	10		14662.1	25940.6	14662.1	0	22557
2013-01-11	2	1	0	0	0		4511.41	2255.7	0	0	0
2013-01-12	1	1	1	0	0		2255.7	2255.7	2255.7	0	0
2013-01-13	0	0	0	0	0		0	0	0	0	0
2013-01-14	0	0	0	2	0		0	0	0	4511.41	0
2013-01-15	7	1	5	4	9		15789.9	2255.7	11278.5	9022.81	20301.3
2013-01-16	3	5	0	15	3		6767.11	11278.5	0	33835.6	6767.11
2013-01-17	5	13	5	0	1		11278.5	29324.1	11278.5	0	2255.7
2013-01-18	0	0	0.5	0	0		0	0	1127.85	0	0
2013-01-19	0	0	0	0	0		0	0	0	0	0
2013-01-20	0	0	0	0	0		0	0	0	0	0
2013-01-21	0	0	0	0	0		0	0	0	0	0
2013-01-22	0	7	4	1	6		0	15789.9	9022.81	2255.7	13534.2
2013-01-23	11	4	7.5	2	14		24812.7	9022.81	16917.8	4511.41	31579.9
2013-01-24	0	0	0	0	0		0	0	0	0	0
2013-01-25	0	0	0	0	0		0	0	0	0	0
2013-01-27	0	0	0	0	0		0	0	0	0	0
2013-01-28	0	11	6	1	0		0	24812.7	13534.2	2255.7	0
2013-01-29	18	24	8	7	10		40602.7	54136.9	18045.6	15789.9	22557
2013-01-30	2	13	5	1	8		4511.41	29324.1	11278.5	2255.7	18045.6
2013-01-31	2	3	3	0	0		4511.41	6767.11	6767.11	0	0
2013-02-01	0	0	0	0	0		0	0	0	0	0
2013-02-02	0	0	0	0	0		0	0	0	0	0
2013-02-03	0	0	0	0	0		0	0	0	0	0
2013-02-04	0	0	0	0	0		0	0	0	0	0
2013-02-05	0	0	0	0	0		0	0	0	0	0
2013-02-06	0	0	0	0	0		0	0	0	0	0
2013-02-07	0	0	0	4	0		0	0	0	9022.81	0
2013-02-08	0	27	8	10	17		0	60904	18045.6	22557	38347
2013-02-09	7	6	2	14	6		15789.9	13534.2	4511.41	31579.9	13534.2
2013-02-10	0	0	0	5	0		0	0	0	11278.5	0
2013-02-11	0	0	0	5	0		0	0	0	11278.5	0
2013-02-12	0	13	0	0	16		0	29324.1	0	0	36091.3
2013-02-13	2	12	8	14	4		4511.41	27068.4	18045.6	31579.9	9022.81
2013-02-14	0	20	0	2	8		0	45114.1	0	4511.41	18045.6
2013-02-15	8	9	4	2	6		18045.6	20301.3	9022.81	4511.41	13534.2
2013-02-16	0	0	0	0	0		0	0	0	0	0
2013-02-17	0	0	0	0	0		0	0	0	0	0
2013-02-18	0	0	0	0	0		0	0	0	0	0
2013-02-19	0	0	0	0	0		0	0	0	0	0
2013-02-20	0	0	0	0	0		0	0	0	0	0
2013-02-21	4	3	5	0	7		9022.81	6767.11	11278.5	0	15789.9
2013-02-22	9	26	8	27	22		20301.3	58648.3	18045.6	60904	49625.5
2013-02-24	0	13	0	1	8		0	29324.1	0	2255.7	18045.6
2013-02-25	7	17	5	0	5		15789.9	38347	11278.5	0	11278.5
2013-02-26	0	8	0	5	8		0	18045.6	0	11278.5	18045.6
2013-02-27	6	14	0	5	2		13534.2	31579.9	0	11278.5	4511.41
2013-02-28	0	17	2	6	0		0	38347	4511.41	13534.2	0
2013-03-01	0	0	0	0	0		0	0	0	0	0
2013-03-02	0	0	0	0	0		0	0	0	0	0
2013-03-03	0	0	0	0	0		0	0	0	0	0
2013-03-04	0	0	0	0	0		0	0	0	0	0
2013-03-05	8	8	12.5	0	0		18045.6	18045.6	28196.3	0	0
2013-03-06	7	26	1	1	8		15789.9	58648.3	2255.7	2255.7	18045.6
2013-03-07	11.5	22	6	5	0		25940.6	49625.5	13534.2	11278.5	0
2013-03-08	3	24	1	16.5	12.5		6767.11	54136.9	2255.7	37219.1	28196.3
2013-03-09	3	0	0	7	1		6767.11	0	0	15789.9	2255.7
2013-03-10	0	7	0	1	0		0	15789.9	0	2255.7	0
2013-03-11	0	0	0	11	1		0	0	0	24812.7	2255.7
2013-03-12	16	35	9	10	21		36091.3	78949.6	20301.3	22557	47369.8
2013-03-13	8	7	5	8	9		18045.6	15789.9	11278.5	18045.6	20301.3
2013-03-14	5	0	0	13	10		11278.5	0	0	29324.1	22557
2013-03-15	8	12	2	0	3.5		18045.6	27068.4	4511.41	0	7894.96
2013-03-16	0	0	0	0	0		0	0	0	0	0
2013-03-17	10	25	10	2	17.5		22557	56392.6	22557	4511.41	39474.8
2013-03-18	6	0	8	4	3		13534.2	0	18045.6	9022.81	6767.11
2013-03-19	12	30	3	8	18		27068.4	67671.1	6767.11	18045.6	40602.7
2013-03-20	4	21	7.5	10	6		9022.81	47369.8	16917.8	22557	13534.2
2013-03-21	7	5	8.5	9	0		15789.9	11278.5	19173.5	20301.3	0
2013-03-22	0	0	0	0	9		0	0	0	0	20301.3
2013-03-23	1	0	0	0	0		2255.7	0	0	0	0
2013-03-24	1	35	1	15	9		2255.7	78949.6	2255.7	33835.6	20301.3
2013-03-25	1	1	5	0	0		2255.7	2255.7	11278.5	0	0
2013-03-26	1	30	7	21	20		2255.7	67671.1	15789.9	47369.8	45114.1
2013-03-27	1	15	3	0	12		2255.7	33835.6	6767.11	0	27068.4
2013-03-28	1	5	7	0	0		2255.7	11278.5	15789.9	0	0

## Sheet: Egg # calculator
Diameter of egg (mm)	0.946033
Radius of egg (mm)	0.473017
Volume of egg (mm^3)	0.443321
Pi	3.14159
Volume of egg (mL)	0.000443321
N	2255.7

## Sheet: Final Wt(g) & FL(cm)
Tank	Sex	Wt (g)	FL (cm)
5B	F	73.3	14.7
5B	M	88.9	15.3
5B	F	106.8	15.9
5B	M	114.6	16.2
5A	F	143.9	17.5
5A	F	97.3	15.2
5A	F	87.3	15.5
5A	F	63.6	14.2
4B	F	110.2	15.9
4B	F	108	16.2
4B	F	70.3	14.7
4B	M	110.7	16.5
4A	F	113.1	17
4A	F	75.8	14.4
4A	F	96.7	16.4
4A	F	79.3	15.2
3B	F	83.9	15.2
3B	M	85.4	15.4
3B	M	87	15.5
3B	M	116.3	17.5
3A	M	101.7	15.8
3A	F	99.8	16.1
3A	F	85.6	15.4
3A	F	102.9	15.9
2B	F	95.8	16.3
2B	F	82.1	15.9
2B	M	52.1	13.6
2B	M	94.4	16.2
2A	F	91	15.9
2A	F	95.2	16.1
2A	F	94.1	15.7
2A	M	128.8	17
1B	F	95.2	16
1B	M	67.4	13.9
1B	F	105.8	15.9
1B	M	119	16.5
1A	F	84.3	15.4
1A	M	129.4	17.8
1A	F	79.5	15.3
1A	M	126.3	17.5

## Sheet: F and sex ratio
systems	# F	M:F
1	4	(4:4)
3	4	(4:4)
2	5	(3:5)
5	6	(2:6)
4	7	(1:7)

## Sheet: Temperature (Celsius)
Date	Temperature (*C)
	1	2	3	4	5
2013-01-01	24.6	25.8	24.5	24.7	24.6
2013-01-02	23.2	24.7	24.8	25.1	24.9
2013-01-03	24.8	26	26.1	26.2	26.2
2013-01-04	25.2	25.1	25.2	25.3	25.2
2013-01-05	24.3	24.1	24.2	24.3	24.2
2013-01-07	25.7	26.4	26.6	26.5	26.1
2013-01-08	25.8	26.2	26.2	26.4	26
2013-01-09	27	27.3	27.2	27.6	27.4
2013-01-10	27.3	27.7	27.9	28.1	28.1
2013-01-11	26.5	26.6	27	26.9	26.9
2013-01-12	26.4	26.5	26.6	26.7	26.6
2013-01-13	26.8	27	27	27.1	26.5
2013-01-14	26	26.7	26.8	27	27.1
2013-01-15	27.2	27.4	27.2	27.6	27.4
2013-01-16	26.9	27	27	27.2	26.9
2013-01-17	26.9	27	27.1	27.2	26.9
2013-01-18	23.8	24.4	24.6	24.5	24.8
2013-01-19	25.2	25.3	25.3	25.3	25.4
2013-01-20	25.6	25.8	25.5	26.8	25.8
2013-01-21	26.1	26.2	26.2	26.3	26
2013-01-22	25.1	25.3	25.4	25.5	25.6
2013-01-23	24.1	24.3	23.8	24	24.8
2013-01-24	24.4	24.2	24.7	24.1	22.1
2013-01-25	24.1	24.2	24.3	22.8	24.5
2013-01-27	24.2	24.6	24.7	24.7	24.8
2013-01-28	26.1	26.4	26.2	26.4	26.3
2013-01-29	26.4	26.5	26.7	27	26.9
2013-01-30	23.7	26.8	26.8	27	27
2013-01-31	25.8	26.2	26.1	26.3	26.2
2013-02-01	24.1	24.2	24.5	24.3	21.9
2013-02-02	24.3	24.3	24.4	24.5	24.2
2013-02-03	22.5	23	23.1	23.1	23.3
2013-02-04	22.2	22.5	22.3	22.7	22.3
2013-02-05	22.3	22.5	22.5	22.5	22.6
2013-02-06	24	24.4	24	24	24.3
2013-02-07	26.1	26.4	26.2	26.6	26.5
2013-02-08	26.6	26.9	26.7	27.1	26.7
2013-02-09	25.7	25.9	25.6	26	26
2013-02-10	25.3	25.5	25.4	25.3	25.7
2013-02-11	25.7	26.1	26.2	25.4	26.3
2013-02-12	26.5	26.9	26.8	26.2	27
2013-02-13	26.9	27.4	27.4	26.7	27.8
2013-02-14	26.4	26.9	27	26.2	27
2013-02-15	25	25.3	25.2	24.5	25.5
2013-02-16	23.7	24.3	24.5	23.6	24.6
2013-02-17	21.9	22.7	22.6	21.6	22.2
2013-02-18	22	21.1	21.3	21.6	21.7
2013-02-19	22.4	22.6	22.6	21.8	22.7
2013-02-20	24.5	25	25	24.2	25.2
2013-02-21	25.5	25.8	25.6	25.6	25.1
2013-02-22	25.3	25.6	25.6	25.1	26
	25.3	25.6	25.6	25.1	26
2013-02-24	27.2	27.5	27.3	26.6	27.5
2013-02-25	27.6	27.7	27.8	26.9	27.7
2013-02-26	27.6	27.7	27.8	27	27.8
2013-02-27	27.3	27.8	27.5	26.5	27.6
2013-02-28	26.9	27.4	26.8	25.8	26.8
2013-03-01	26.5	26.9	26.6	25.2	26.5
2013-03-02	26.3	26.4	26.3	24.9	26.3
2013-03-03	25	25.8	25.9	24.3	25.6
2013-03-04	25.1	25.2	25.1	23.6	25.1
2013-03-05	25.5	25.6	25.7	24.1	25.5
2013-03-06	27.3	27.5	27.6	26.3	27.3
2013-03-07	27.6	28.1	27.8	24.1	27.7
2013-03-08	27.8	28.2	28.1	26.3	27.8
2013-03-09	27.4	27.9	27.9	26.1	27.9
2013-03-10	27.8	28.4	28.1	26.3	28.1
2013-03-11	28.5	28.8	28.4	27	28.5
2013-03-12	28.4	28.6	28.7	26.5	28.9
2013-03-13	27.6	28.5	28.5	27.1	28.5
2013-03-14	27.8	28.2	28.2	27.6	28.1
2013-03-15	27.7	28	27.9	26.3	28
2013-03-16	27.9	28.2	28	26.6	28.2
2013-03-17	27.8	28.2	28.2	26.9	28.2
2013-03-18	28.2	28.6	28.5	27.4	28.5
2013-03-19	28.5	28.7	28.4	27.8	28.9
2013-03-20	28.1	28.4	28.4	27.6	28.7
2013-03-21	27.7	28.3	28	27.2	28.4
2013-03-22	27.9	28.2	28	26.9	28.3
2013-03-23	28.6	28.5	28.2	27.4	28.7
2013-03-24	28.1	28.4	28.3	27.5	28.5
2013-03-25	28.1	28.6	28.1	27.5	28.5
2013-03-26	27.6	28.2	28.1	26.7	28
2013-03-27	27.4	28	27.6	26.1	27.7
2013-03-28	27.5	28	27.8	26.2	28

## Sheet:  DO (mg per L)
	DO (mg/L)
	1	2	3	4	5
2013-01-01	7.36	7.13	7.07	7.01	6.93
2013-01-02	6.84	6.75	6.72	6.77	6.84
2013-01-03	7.02	6.86	6.8	6.75	6.71
2013-01-04	6.89	6.67	6.64	6.67	6.47
2013-01-05	6.84	6.73	6.69	6.74	6.67
2013-01-07	6.94	6.92	6.9	6.89	6.83
2013-01-08	6.55	6.46	6.41	6.59	6.5
2013-01-09	6.94	6.72	6.61	6.61	6.61
2013-01-10	6.7	6.54	6.51	6.48	6.44
2013-01-11	6.7	6.59	6.57	6.53	6.47
2013-01-12	6.65	6.45	6.5	6.37	6.39
2013-01-13	6.5	6.39	6.41	6.34	6.39
2013-01-14	6.56	6.48	6.48	6.43	6.48
2013-01-15	6.51	6.45	6.58	6.54	6.71
2013-01-16	6.64	6.55	6.48	6.52	6.48
2013-01-17	6.26	6.23	6.17	6.24	6.27
2013-01-18	6.45	6.44	6.45	6.48	6.57
2013-01-19	6.35	6.29	6.28	6.31	6.39
2013-01-20	6.95	6.87	6.8	6.86	6.74
2013-01-21	6.69	6.64	6.63	6.65	6.6
2013-01-22	6.53	6.52	6.5	6.55	6.59
2013-01-23	6.27	6.2	6.24	6.35	6.36
2013-01-24	6.37	6.3	6.26	6.38	6.42
2013-01-25	6.56	6.61	6.51	6.58	6.67
2013-01-27	6.57	6.6	6.68	6.6	6.94
2013-01-28	6.62	6.61	6.55	6.88	6.62
2013-01-29
2013-01-30	6.71	6.66	6.62	6.6	6.52
2013-01-31	6.57	6.53	6.52	6.58	6.52
2013-02-01	6.5	6.51	6.51	6.55	6.7
2013-02-02	6.69	6.54	6.51	6.48	6.38
2013-02-03	6.59	6.61	6.54	6.57	6.59
2013-02-04	6.72	6.85	6.73	6.83	6.73
2013-02-05	6.84	6.92	6.83	6.92	7.09
2013-02-06	7.11	6.99	6.92	6.91	6.92
2013-02-07	7.03	7.02	7.11	7.02	7.19
2013-02-08	7	7.02	7.16	6.99	7.13
2013-02-09	6.79	6.81	6.86	6.93	6.82
2013-02-10	6.53	6.57	6.49	6.46	6.62
2013-02-11	6.44	6.49	6.43	6.46	6.61
2013-02-12	6.56	6.7	6.59	6.63	6.69
2013-02-13	6.71	6.73	6.65	6.63	6.72
2013-02-14	6.69	6.72	6.65	6.74	6.76
2013-02-15	6.47	6.57	6.54	6.62	6.62
2013-02-16	6.46	6.5	6.47	6.52	6.49
2013-02-17	6.67	6.61	6.51	6.62	6.69
2013-02-18	6.78	6.78	6.73	6.81	6.84
2013-02-19	7.23	6.95	6.81	6.89	6.81
2013-02-20	7.14	7.14	7.04	7.27	7.35
2013-02-21	7.13	7.44	7.31	7.29	7.28
2013-02-22	7.13	7.14	7.09	7.21	7.09
	6.83	6.88	6.77	6.88	6.78
2013-02-24	6.54	6.67	6.62	6.79	6.74
2013-02-25	6.5	6.67	6.62	6.73	6.71
2013-02-26	6.57	6.55	6.53	6.62	6.61
2013-02-27	6.54	6.51	6.51	6.59	6.59
2013-02-28	6.47	6.42	6.37	6.53	6.42
2013-03-01	6.45	6.42	6.38	6.5	6.44
2013-03-02	6.44	6.45	6.42	6.58	6.49
2013-03-03	6.52	6.52	6.5	6.66	6.64
2013-03-04	6.61	6.55	6.48	6.68	6.49
2013-03-05	6.58	6.55	6.49	6.75	6.51
2013-03-06	6.58	6.59	6.54	6.75	6.71
2013-03-07	6.81	6.8	6.72	6.85	6.74
2013-03-08	6.73	6.97	6.62	6.82	6.58
2013-03-09	6.47	6.46	6.42	6.54	6.38
2013-03-10	6.32	6.51	6.34	6.54	6.47
2013-03-11	6.39	6.51	6.32	6.44	6.39
2013-03-12	6.36	6.35	6.31	6.4	6.43
2013-03-13	6.34	6.29	6.29	6.39	6.39
2013-03-14	6.32	6.24	6.16	6.39	6.32
2013-03-15	6.21	6.25	6.15	6.29	6.23
2013-03-16	6.41	6.29	6.22	6.42	6.24
2013-03-17	6.46	6.38	6.28	6.52	6.47
2013-03-18	6.45	6.36	6.26	6.5	6.35
2013-03-19	6.23	6.2	6.21	6.4	6.33
2013-03-20	6.35	6.26	6.15	6.43	6.35
2013-03-21	6.31	6.24	6.09	6.29	6.24
2013-03-22	6.17	6.24	6.19	6.26	6.26
2013-03-23	6.3	6.22	6.22	6.32	6.28
2013-03-24	6.29	6.26	6.22	6.39	6.4
2013-03-25	6.31	6.28	6.23	6.41	6.41
2013-03-26	6.18	6.22	6.29	6.34	6.25
2013-03-27	6.27	6.23	6.2	6.25	6.32
2013-03-28	6.31	6.29	6.26	6.38	6.4

## Sheet: pH
	pH
	1	2	3	4	5
2013-01-01	8.26	8.19	8.25	8.29	8.16
2013-01-02	8.26	8.2	8.24	8.26	8.18
2013-01-03	8.22	8.17	8.22	8.23	8.1
2013-01-04	8.24	8.16	8.24	8.2	8.09
2013-01-05	8.26	8.18	8.25	8.28	8.13
2013-01-07	8.23	8.19	8.23	8.26	8.14
2013-01-08	8.2	8.13	8.18	8.21	8.06
2013-01-09	8.2	8.23	8.27	8.3	8.15
2013-01-10	8.19	8.12	8.22	8.25	8.12
2013-01-11	8.24	8.2	8.28	8.33	8.19
2013-01-12	8.25	8.13	8.2	8.24	8.11
2013-01-13	8.23	8.16	8.25	8.28	8.14
2013-01-14	8.25	8.17	8.23	8.26	8.19
2013-01-15	8.25	8.21	8.25	8.27	8.23
2013-01-16	8.18	8.12	8.17	8.25	8.12
2013-01-17	8.18	8.07	8.13	8.19	8.1
2013-01-18	8.2	8.11	8.18	8.22	8.14
2013-01-19	8.14	8.04	8.1	8.17	8.11
2013-01-20	8.23	8.14	8.21	8.27	8.21
2013-01-21	8.15	8.06	8.11	8.16	8.08
2013-01-22	8.2	8.12	8.15	8.22	8.13
2013-01-23	7.87	7.78	7.85	7.94	7.8
2013-01-24	7.96	7.92	7.98	8.03	7.92
2013-01-25	7.98	7.95	7.95	7.99	7.9
2013-01-27	7.99	7.98	7.98	8.01	7.94
2013-01-28	8.04	7.99	7.99	8	7.94
2013-01-29
2013-01-30	8.09	8.03	8.04	8.09	7.93
2013-01-31	8.11	8.13	8.15	8.07	8.1
2013-02-01	8.15	8.09	8.06	8.14	8.06
2013-02-02	8.12	8.1	8.07	8.17	8.07
2013-02-03	8.16	8.13	8.08	8.19	8.08
2013-02-04	8.08	8.06	8.02	8.11	7.98
2013-02-05	8.12	8.14	8.09	8.13	8.07
2013-02-06	8.09	8.12	8.1	8.13	8.12
2013-02-07	8.01	8	7.99	8.01	8
2013-02-08	7.97	8	7.99	7.97	7.91
2013-02-09	7.99	8.06	8.05	8.06	8.06
2013-02-10	8.05	8.09	8.09	8.12	8.1
2013-02-11	8.05	8.11	8.07	8.14	8.03
2013-02-12	8.09	8.11	8.06	8.12	8.05
2013-02-13	8.15	8.1	8.04	8.09	8.04
2013-02-14	8.14	8.11	8.06	8.11	8.09
2013-02-15	8.03	8.09	8.03	8.09	7.99
2013-02-16	8.15	8.1	8.04	8.1	8.1
2013-02-17	8.16	8.15	8.05	8.14	8.01
2013-02-18	8.14	8.14	8.03	8.15	8.04
2013-02-19	8.07	8.11	8	8.11	8.01
2013-02-20	8.02	8.09	7.99	8.1	7.71
2013-02-21	8	7.99	7.92	8.03	7.94
2013-02-22	7.84	8.04	7.97	8.1	7.96
	7.97	8.1	8.04	8.11	8.03
2013-02-24	8.06	8.11	8.05	8.04	8.12
2013-02-25	8.07	8.12	8.07	8.12	8.05
2013-02-26	8.15	8.15	8.11	8.17	8.09
2013-02-27	8.2	8.15	8.13	8.2	8.13
2013-02-28	8.17	8.15	8.13	8.2	8.14
2013-03-01	7.92	8.12	8.1	8.18	8.17
2013-03-02	8.18	8.15	8.11	8.2	8.06
2013-03-03	8.17	8.14	8.08	8.16	8.04
2013-03-04	7.93	8.12	8.07	8.16	8.06
2013-03-05	8.08	8.15	8.07	8.16	8.06
2013-03-06	7.93	7.95	7.84	7.95	7.93
2013-03-07	7.97	7.93	7.87	7.93	7.88
2013-03-08	7.94	7.89	7.86	7.94	7.86
2013-03-09	7.91	7.86	7.84	7.86	7.7
2013-03-10	8	8	7.93	8.02	7.84
2013-03-11	8.02	7.96	7.93	8.01	7.85
2013-03-12	7.99	7.93	7.94	7.99	7.84
2013-03-13	7.97	7.91	7.93	8	7.85
2013-03-14	7.95	7.99	8	8.09	7.95
2013-03-15	8.09	8.06	8.06	8.1	7.99
2013-03-16	8.04	8	7.99	8.08	7.94
2013-03-17	8.08	8.06	8.03	8.1	7.99
2013-03-18	8.06	8.02	8.01	8.09	7.95
2013-03-19	8.1	8.06	8.04	8.14	7.97
2013-03-20	8.12	8.07	8.03	8.18	7.98
2013-03-21	8.16	8.1	8.05	8.15	8
2013-03-22	8.08	8.09	8.08	8.14	7.99
2013-03-23	8.14	8.06	8.06	8.12	7.98
2013-03-24	8.11	8.02	8.03	8.12	7.99
2013-03-25	8.13	8.06	8.04	8.14	8
2013-03-26	8.07	8.09	8.16	8.16	8.04
2013-03-27	8.51	8.08	8.06	8.15	8.06
2013-03-28	8.18	8.12	8.09	8.19	8.08

[truncated: 2 more sheets: Salinity (ppt), Alkalinity (meq per L)]
